# Supplementary material for: Allelic Variation and Distribution of the Major Maturity Genes in Different Soybean Collections
Source: Front Plant Sci. 2018 Sep 4;9:1286. doi: 10.3389/fpls.2018.01286 (PMC6131654; doi:10.3389/fpls.2018.01286)
Supplement: TABLE S1 — SNP calls located in the genomic regions of E1, E2, E3, and E4 genes in soybean collections of North-American (NA) ancestral lines, Chinese germplasm, European varieties, and genotypes developed and released at Institute of Field and Vegetable Crops – NS (Novi Sad) varieties, NS breeding lines, high-protein and high-oil genotypes from NS collection. [file Table_1.xls]

## Sheet: Sheet 1
Supplement 1. SNP calls located in the genomic regions of E1, E2, E3 and E4 genes in soybean collections of North-American (NA) ancestral lines, Chinese germplasm, European varieties, and genotypes developed and released at Institute of Field and Vegetable Crops - NS (Novi Sad) varieties, NS breeding lines, high-protein and high-oil genotypes from NS collection
Genotype	Population	E1								E2										E3										E4
		S6_20163915	S6_20163924	S6_20163945	S6_20163963	S6_20164170	S6_20207569	S6_20238533	S6_20241890	S10_45302551	S10_45305285	S10_45305867	S10_45310798	S10_45312119	S10_45312153	S10_45320189	S10_45325752	S10_45341804	S10_45343076	S19_47588397	S19_47589066	S19_47596785	S19_47627004	S19_47664784	S19_47664801	S19_47689547	S19_47689592	S19_47741529	S19_47742029	S20_32528772	S20_32529000	S20_32591873	S20_33231337	S20_33238339	S20_33238393	S20_34529213	S20_34529335	S20_34530780	S20_34535841
A.K. (Harrow)	NA ancestral	C	G	A	A	G	T	G	A	A	A	G	A	C	G	A	T	G	G	C	A	C	C	T	A	T	A	T	C	C	A	G	A	A	T	G	C	A	C
Illini	NA ancestral	C	G	A	A	G	T	G	A	A	A	G	A	C	G	A	T	G	G	C	A	C	C	T	A	T	A	T	C	T	G	G	A	A	T	G	C	A	C
Manchu	NA ancestral	C	G	A	A	G	T	G	A	A	A	G	A	C	G	A	T	G	G	C	A	C	C	T	A	T	A	T	C	C	G	G	A	A	T	A	T	G	C
Ogden	NA ancestral	C	G	A	A	A	T	G	A	G	G	T	A	C	G	C	T	A	T	C	A	C	C	T	A	T	A	T	C	C	G	G	A	A	T	G	C	A	C
Roanoke	NA ancestral	C	G	A	A	G	T	G	A	G	G	G	A	C	G	C	T	A	T	C	A	C	C	T	A	T	A	T	C	C	G	G	A	A	T	G	C	A	C
S-100	NA ancestral	C	G	A	A	G	T	G	A	A	A	G	A	C	G	A	T	G	G	C	A	C	C	T	A	T	A	T	C	T	G	G	A	A	T	G	C	A	C
192	NA ancestral	C	G	A	A	G	T	A	G	G	G	T	T	C	G	C	T	A	T	T	A	C	C	T	A	T	T	T	C	C	A	G	A	A	T	G	T	G	C
Dunfield	NA ancestral	C	G	A	A	G	T	G	A	G	G	T	T	C	G	C	T	A	T	C	A	C	C	T	A	T	A	T	C	C	G	G	A	A	T	A	T	G	C
Mukden	NA ancestral	C	G	A	A	G	T	G	A	G	G	T	T	C	G	C	T	A	T	C	A	G	C	T	A	C	G	T	C	C	G	G	A	A	T	G	T	G	C
Manitoba Brown	NA ancestral	C	G	A	A	G	T	G	A	G	G	T	T	C	G	C	T	A	T	T	G	C	G	A	A	C	G	T	C	C	G	G	A	A	T	G	T	G	C
Colfax	NA ancestral	G	A	C	C	A	T	G	A	A	A	G	A	C	G	A	A	G	G	C	A	C	C	T	A	T	A	T	C	T	A	G	A	A	T	G	C	A	C
Perry	NA ancestral	G	A	C	C	G	T	G	A	A	A	G	A	C	G	A	T	G	G	C	G	C	C	T	A	C	G	T	C	C	G	G	A	A	T	G	T	G	C
Capital	NA ancestral	G	A	C	C	G	T	G	A	G	G	G	A	C	G	C	T	A	T	T	G	C	G	A	A	C	G	T	C	C	G	G	A	A	T	G	T	G	C
Harper	NA ancestral	G	A	C	C	G	T	G	A	A	A	G	A	C	G	A	T	G	G	T	G	C	G	A	A	C	G	T	C	T	A	G	A	A	T	G	C	A	C
614/83	NA ancestral	G	A	C	C	A	T	G	A	G	G	T	T	C	G	C	T	A	T	C	G	C	C	T	A	C	G	T	C	C	G	G	A	A	T	A	T	G	C
Apache	NA ancestral	G	A	C	C	G	T	G	A	G	G	T	T	C	G	C	T	A	T	T	G	C	C	T	A	C	G	T	C	C	G	G	A	A	T	G	T	G	C
Elgin	NA ancestral	G	A	C	C	G	T	G	A	G	G	T	T	C	G	C	T	A	T	C	A	C	C	T	A	T	A	T	C	C	G	G	A	A	T	G	C	A	C
Flambeau	NA ancestral	G	A	C	C	G	T	G	A	G	G	T	T	C	G	C	T	A	T	C	A	C	C	T	A	T	A	T	C	C	G	G	A	A	T	G	C	A	C
Four	NA ancestral	G	A	C	C	G	T	G	A	G	G	T	T	C	G	C	T	A	T	C	A	C	C	T	A	T	A	T	C	C	G	G	A	A	T	G	T	G	C
Korean	NA ancestral	G	A	C	C	A	T	G	A	G	G	T	T	C	G	C	T	A	T	C	G	C	C	T	A	C	G	T	C	C	G	G	A	A	T	G	T	G	C
Strain No.18	NA ancestral	G	A	C	C	A	T	G	A	G	G	T	T	C	G	C	T	A	T	C	A	C	C	T	A	T	A	T	C	C	G	G	A	A	T	G	T	G	C
Kabott	NA ancestral	G	A	C	C	G	T	G	A	G	G	T	T	C	G	C	T	A	T	T	G	C	G	A	A	C	G	T	C	C	G	G	A	A	T	G	T	G	C
Mandarin	NA ancestral	G	A	C	C	G	T	G	A	G	G	T	T	C	G	C	T	A	T	T	G	C	G	A	A	C	G	T	C	C	G	G	A	A	T	G	T	G	C
Pando	NA ancestral	G	A	C	C	A	T	G	A	G	G	T	T	C	G	C	T	A	T	T	G	C	G	A	A	C	G	T	C	C	G	G	A	A	T	G	T	G	C
Richland	NA ancestral	G	A	C	C	A	T	G	A	G	G	T	T	C	G	C	T	A	T	C	A	C	G	A	A	T	A	T	C	C	G	G	A	A	T	G	C	A	C
Fiskeby 840-7-3	NA ancestral	G	A	C	C	G	T	A	G	G	G	T	T	C	G	C	T	A	T	T	G	C	G	A	A	C	G	T	C	T	A	G	A	A	T	G	T	G	C
Fiskeby III	NA ancestral	G	A	C	C	G	T	A	G	G	G	T	T	C	G	C	T	A	T	T	G	C	G	A	A	C	G	T	C	T	A	G	A	A	T	G	T	G	C
Alisa	NS varieties	C	G	A	A	G	T	G	A	G	G	T	T	C	G	C	T	A	T	C	A	C	C	T	A	T	A	T	C	C	G	G	A	A	T	G	C	A	C
Becejka	NS varieties	C	G	A	A	G	T	G	A	G	G	T	T	C	G	C	T	A	T	C	A	C	C	T	A	T	A	T	C	C	G	G	A	A	T	G	T	G	C
Krajina	NS varieties	C	G	A	A	G	T	G	A	G	G	T	T	C	G	C	T	A	T	C	A	C	C	T	A	T	A	T	C	C	G	G	A	A	T	G	C	A	C
NS Pantera	NS varieties	C	G	A	A	G	T	G	A	G	G	T	T	C	G	C	T	A	T	C	A	C	C	T	A	T	A	T	C	C	G	G	A	A	T	G	T	G	C
Zvezda	NS varieties	C	G	A	A	G	T	G	A	G	G	T	T	C	G	C	T	A	T	C	A	C	C	T	A	T	A	T	C	C	G	G	A	A	T	G	C	A	C
Afrodita	NS varieties	G	A	C	C	G	T	G	A	G	G	T	T	C	G	C	T	A	T	C	A	C	C	T	A	T	A	T	C	T	G	G	A	A	T	G	C	A	C
Aleksandra	NS varieties	G	A	C	C	A	T	G	A	G	G	T	T	C	G	C	T	A	T	C	A	C	C	T	A	T	A	T	C	C	A	G	A	A	T	G	C	A	C
Ana	NS varieties	G	A	C	C	G	T	G	A	G	G	T	T	C	G	C	T	A	T	C	A	C	C	T	A	T	A	T	C	C	G	G	A	A	T	G	C	A	C
Avala	NS varieties	G	A	C	C	G	T	G	A	G	G	T	T	C	G	C	T	A	T	C	G	C	C	T	A	C	G	T	C	C	G	G	A	A	T	G	T	G	C
Balkan	NS varieties	G	A	C	C	G	T	G	A	G	G	T	T	C	G	C	T	A	T	C	A	C	C	T	A	T	A	T	C	C	G	G	A	A	T	G	T	G	C
Diva	NS varieties	G	A	C	C	G	T	G	A	G	G	T	T	C	G	C	T	A	T	C	A	C	C	T	A	T	A	T	C	T	G	G	A	A	T	G	C	A	C
Drina	NS varieties	G	A	C	C	G	T	G	A	G	G	T	T	T	G	C	T	A	T	C	A	C	C	T	A	T	A	T	C	C	G	G	A	A	T	G	C	A	C
Galina	NS varieties	G	A	C	C	G	T	G	A	G	G	T	T	C	G	C	T	A	T	C	A	C	C	T	A	T	A	T	C	C	G	G	A	A	T	G	T	G	C
Glorija	NS varieties	G	A	C	C	A	T	G	A	G	G	T	T	C	G	C	T	A	T	C	A	C	C	T	A	T	A	T	C	C	G	G	A	A	T	G	C	A	C
Indijana	NS varieties	G	A	C	C	G	T	G	A	G	G	T	T	C	G	C	T	A	T	C	A	C	C	T	A	T	A	T	C	T	G	G	A	A	T	G	C	A	C
Julija	NS varieties	G	A	C	C	G	T	G	A	G	G	T	T	C	G	C	T	A	T	C	A	C	C	T	A	T	A	T	C	C	A	G	A	A	T	G	T	G	C
Macvanka	NS varieties	G	A	C	C	G	T	G	A	G	G	T	T	C	G	C	T	A	T	C	A	C	C	T	A	T	A	T	C	T	G	G	A	A	T	G	C	A	C
Merkur	NS varieties	G	A	C	C	G	T	G	A	G	G	T	T	C	G	C	T	A	T	C	A	C	C	T	C	T	A	T	C	C	A	G	A	A	T	G	C	A	C
Novosadjanka	NS varieties	G	A	C	C	G	T	G	A	G	G	T	T	C	G	C	T	A	T	C	A	C	C	T	C	T	A	T	C	T	G	G	A	A	T	G	T	A	C
NS-105	NS varieties	G	A	C	C	A	T	G	A	G	G	T	T	C	G	C	T	A	T	C	A	C	C	T	A	T	A	T	C	C	G	G	A	A	T	G	T	G	C
NS-202	NS varieties	G	A	C	C	A	T	G	A	G	G	T	T	C	G	C	T	A	T	C	A	C	C	T	A	T	A	T	C	T	G	G	A	A	A	G	T	G	C
NS-21	NS varieties	G	A	C	C	G	T	G	A	G	G	T	T	C	G	C	T	A	T	C	A	C	C	T	A	T	A	T	C	C	G	G	A	A	T	G	T	G	C
NS-9	NS varieties	G	A	C	C	G	T	G	A	G	G	T	T	C	G	C	T	A	T	C	A	C	C	T	A	T	A	T	C	C	G	G	A	A	T	G	T	G	C
NS Apolo	NS varieties	G	A	C	C	G	T	G	A	G	G	T	T	C	G	C	T	A	T	C	A	C	C	T	A	T	A	T	C	C	G	G	A	A	T	G	T	G	C
NS Kaca	NS varieties	G	A	C	C	G	T	G	A	G	G	T	T	C	G	C	T	A	T	C	G	C	C	T	A	C	G	T	C	T	G	G	A	A	T	G	C	A	C
NS Maximus	NS varieties	G	A	C	C	G	T	G	A	G	G	T	T	C	G	C	T	A	T	C	A	C	C	T	A	T	A	T	C	C	G	G	A	A	T	G	T	G	C
NS Optimus	NS varieties	G	A	C	C	G	T	G	A	G	G	T	T	C	G	C	T	A	T	C	A	C	C	T	A	T	A	T	C	C	G	G	A	A	T	G	C	G	C
NS Virtus	NS varieties	G	A	C	C	G	T	G	A	G	G	T	T	C	G	C	T	A	T	C	A	C	C	T	A	T	A	T	C	C	G	G	A	A	T	G	C	A	C
Ravnica	NS varieties	G	A	C	C	G	T	G	A	G	G	T	T	C	G	C	T	A	T	C	A	C	C	T	A	T	A	T	C	T	G	G	A	A	A	G	T	G	C
Rubin	NS varieties	G	A	C	C	G	T	G	A	G	G	T	T	C	G	C	T	A	T	C	A	C	C	T	A	T	A	T	C	T	G	G	A	A	T	G	C	A	C
Sapcanka	NS varieties	G	A	C	C	G	T	G	A	G	G	T	T	C	G	C	T	A	T	C	A	C	C	T	A	T	A	T	C	C	G	G	A	A	T	G	C	A	C
Sava	NS varieties	G	A	C	C	G	T	G	A	G	G	T	T	C	G	C	T	A	T	C	A	C	C	T	A	T	A	T	C	C	G	G	A	A	T	G	C	A	C
Senka	NS varieties	G	A	C	C	G	T	G	A	G	G	T	T	C	G	C	T	A	T	C	G	C	C	T	A	C	G	T	C	C	G	G	A	A	T	G	C	A	C
Tajfun	NS varieties	G	A	C	C	G	T	G	A	G	G	T	T	C	G	C	T	A	T	C	A	C	C	T	A	T	A	T	C	C	G	G	A	A	T	G	C	A	C
Valjevka	NS varieties	G	A	C	C	G	T	G	A	G	G	T	T	C	G	C	T	A	T	C	A	C	C	T	A	T	A	T	C	C	G	G	A	A	T	G	C	A	C
Venera	NS varieties	G	A	C	C	G	T	G	A	G	G	T	T	C	G	C	T	A	T	C	A	C	C	T	A	T	A	T	C	T	G	G	A	A	A	G	T	G	C
Vera	NS varieties	G	A	C	C	G	T	G	A	G	G	T	T	C	G	C	T	A	T	C	A	C	C	T	A	T	A	T	C	C	G	G	A	A	T	G	T	G	C
Victoria	NS varieties	G	A	C	C	G	T	G	A	G	G	T	T	C	G	C	T	A	T	C	A	C	C	T	A	T	A	T	C	C	G	G	A	A	T	G	T	G	C
Vojvodjanka	NS varieties	G	A	C	C	G	T	G	A	G	G	T	T	C	G	C	T	A	T	C	A	C	C	T	A	T	A	T	C	T	G	G	A	A	T	G	C	A	C
Zlata	NS varieties	G	A	C	C	G	T	G	A	G	G	T	T	C	G	C	T	A	T	C	A	C	C	T	A	T	A	T	C	C	G	G	A	A	T	G	C	A	C
Belka	NS varieties	G	A	C	C	A	T	G	A	G	G	T	T	C	G	C	T	A	T	T	G	C	G	A	A	C	G	T	C	C	G	G	A	A	T	G	C	A	C
Fortuna	NS varieties	G	A	C	C	G	T	G	A	G	G	T	T	C	G	C	T	A	T	T	G	C	G	A	A	C	G	G	C	C	A	G	A	A	T	G	C	A	C
Jelica	NS varieties	G	A	C	C	G	T	G	A	G	G	T	T	C	G	C	T	A	T	T	G	C	G	A	A	C	G	T	C	C	G	G	A	A	T	G	C	A	C
Nadja	NS varieties	G	A	C	C	G	T	G	A	G	G	T	T	C	G	C	T	A	T	C	A	G	G	A	A	C	G	T	C	C	G	G	A	A	T	G	C	A	C
NS Zenit	NS varieties	G	A	C	C	G	T	G	A	G	G	T	T	C	G	C	T	A	T	T	G	C	G	A	A	C	G	T	C	C	A	G	A	A	T	G	C	A	C
Proteinka	NS varieties	G	A	C	C	G	T	G	A	G	G	T	T	T	G	C	T	A	T	C	A	G	G	A	A	C	G	T	C	T	G	G	A	A	T	G	C	A	C
Idila	NS varieties	G	A	C	C	A	T	G	A	A	A	G	A	C	G	A	T	G	G	C	A	C	C	T	A	T	A	T	C	C	G	G	A	A	T	G	C	A	C
Mima	NS varieties	G	A	C	C	G	T	G	A	A	A	G	A	C	G	A	T	G	G	C	A	C	C	T	A	T	A	T	C	C	G	G	A	A	T	G	C	A	C
Morava	NS varieties	G	A	C	C	G	T	G	A	A	A	G	A	C	G	A	T	G	G	C	A	C	C	T	A	T	A	T	C	C	G	G	A	A	T	G	C	A	C
NS Fantast	NS varieties	G	A	C	C	G	T	G	A	G	G	G	A	C	G	A	T	G	G	T	G	C	G	A	A	C	G	T	C	T	G	G	A	A	T	G	C	A	C
NS Princeza	NS varieties	G	A	C	C	G	T	G	A	A	A	G	A	C	G	A	T	G	G	T	G	C	G	A	A	C	G	T	C	C	G	G	A	A	T	G	C	A	C
NS Sirius	NS varieties	G	A	C	C	A	T	G	A	A	A	G	A	C	G	A	T	G	G	T	G	C	G	A	A	C	G	T	C	C	G	G	A	A	T	G	T	G	C
NS Zita	NS varieties	G	A	C	C	A	T	G	A	A	A	G	A	C	G	A	T	G	G	T	G	C	G	A	A	C	G	T	C	C	G	G	A	A	T	G	T	G	C
Tea	NS varieties	G	A	C	C	G	T	G	A	A	A	G	A	C	G	A	T	G	G	T	G	C	G	A	A	C	G	T	C	C	G	G	A	A	T	G	C	A	C
Gracia	NS varieties	G	A	C	C	G	T	A	G	G	G	T	T	C	G	C	T	A	T	C	A	C	C	T	A	T	A	T	C	C	A	G	A	A	T	G	C	A	C
Favorit	NS varieties	G	A	C	C	G	T	A	G	G	G	T	T	C	G	C	T	A	T	C	A	C	C	T	A	T	A	T	C	C	A	G	A	A	T	G	T	G	C
JS 95 002	Chinese germplasm	G	A	C	C	G	T	G	A	G	G	T	T	C	G	C	T	A	T	T	G	C	G	A	A	C	G	T	C	C	G	G	A	A	T	A	T	G	C
JS 95 001	Chinese germplasm	G	A	C	C	G	T	G	A	G	G	T	T	C	G	C	T	A	T	T	G	C	G	A	A	C	G	T	C	T	G	G	A	A	A	G	T	G	C
H 1526	Chinese germplasm	G	A	C	C	A	T	G	A	G	G	T	T	C	G	C	T	A	T	T	G	C	G	A	A	C	G	T	C	C	G	G	A	A	T	A	T	G	C
BA 28	Chinese germplasm	G	A	C	C	G	T	G	A	G	G	T	T	C	G	C	T	A	T	T	G	C	G	A	A	C	G	T	C	C	G	G	A	A	T	A	T	G	C
JJ-9222-29-4	Chinese germplasm	G	A	C	C	G	T	G	A	G	G	T	T	C	G	C	T	A	T	T	G	C	G	A	A	C	G	T	C	C	G	G	A	A	T	A	T	G	C
JJ-9231-4-9	Chinese germplasm	G	A	C	C	A	T	G	A	G	G	T	T	C	G	C	T	A	T	T	G	C	G	A	A	C	G	T	C	C	G	G	A	A	T	A	T	G	C
JJ 9365	Chinese germplasm	G	A	C	C	A	T	G	A	G	G	T	T	C	G	C	T	A	T	T	G	C	G	A	A	C	G	T	C	C	G	G	A	A	T	A	T	G	C
JJ 96021	Chinese germplasm	G	A	C	C	G	T	G	A	G	G	T	T	C	G	C	T	A	T	T	G	C	G	A	A	C	G	T	C	C	A	G	A	A	T	G	C	A	C
JJ 9309-10-2	Chinese germplasm	G	A	C	C	G	T	G	A	G	G	T	T	C	G	C	T	A	T	C	G	C	C	T	A	C	G	T	C	C	G	G	A	A	T	A	T	G	C
JJ 9287	Chinese germplasm	G	A	C	C	G	T	A	G	G	G	T	T	C	G	C	T	A	T	T	G	C	G	A	A	C	G	T	C	T	A	G	A	A	T	A	T	G	C
JJ 9145-10-1	Chinese germplasm	G	A	C	C	G	T	A	G	G	G	T	T	C	G	C	T	A	T	T	G	C	G	A	A	C	G	T	C	C	G	G	A	A	T	A	T	G	C
JL 96035	Chinese germplasm	G	A	C	C	G	T	A	G	G	G	T	T	C	G	C	T	A	T	T	G	C	G	A	A	C	G	T	C	C	G	G	A	A	T	A	T	G	C
JL 208	Chinese germplasm	G	A	C	C	G	T	A	G	G	G	T	T	C	G	C	T	A	T	T	G	C	G	A	A	C	G	T	C	T	G	G	A	A	T	A	T	G	C
JS-92-2	Chinese germplasm	G	A	C	C	G	T	A	G	G	G	T	T	C	G	C	T	A	T	T	G	C	G	A	A	C	G	T	C	T	G	G	A	A	T	A	T	G	C
3-13	NS breeding lines	C	G	A	A	G	T	G	A	G	G	T	T	C	T	C	T	A	T	C	A	C	C	T	A	T	A	T	C	T	G	G	A	A	T	G	C	A	C
8-4	NS breeding lines	C	G	A	A	G	T	G	A	G	G	T	T	C	G	C	T	A	T	C	A	C	C	T	A	T	A	T	C	C	G	G	A	A	T	G	C	A	C
8-8	NS breeding lines	C	G	A	A	G	T	G	A	G	G	T	T	C	G	C	T	A	T	C	A	C	C	T	A	T	A	G	C	T	A	G	A	A	T	G	C	A	C
201470	NS breeding lines	C	G	A	A	G	T	G	A	G	G	T	T	C	G	C	T	A	T	C	A	C	C	T	A	T	A	T	C	C	G	G	A	A	T	G	C	A	C
210428	NS breeding lines	C	G	A	A	G	T	G	A	G	G	T	T	C	G	C	T	A	T	C	A	C	C	T	A	T	A	T	C	C	A	G	A	A	T	G	C	A	C
400138	NS breeding lines	C	G	A	A	G	T	G	A	G	G	T	T	C	G	C	T	A	T	C	A	C	C	T	A	T	A	T	C	C	G	G	A	A	T	G	C	A	C
400139	NS breeding lines	C	G	A	A	G	T	G	A	G	G	T	T	C	G	C	T	A	T	C	A	C	C	T	A	T	A	T	C	C	A	G	A	A	T	G	T	G	C
401122	NS breeding lines	C	G	A	A	G	T	G	A	G	G	T	T	C	G	C	T	A	T	C	A	C	C	T	A	T	A	T	C	C	A	G	A	A	T	G	T	G	C
500010	NS breeding lines	C	G	A	A	G	T	G	A	G	G	T	T	C	G	C	T	A	T	C	A	C	C	T	A	T	A	T	C	C	G	G	A	A	T	G	C	A	C
510033	NS breeding lines	C	G	A	A	G	T	G	A	G	G	T	T	C	G	C	T	A	T	C	A	C	C	T	A	T	A	T	C	C	A	G	A	A	T	G	C	A	C
510035	NS breeding lines	C	G	A	A	G	T	G	A	G	G	T	T	C	G	C	T	A	T	C	A	C	C	T	A	T	A	T	C	T	A	G	A	A	T	G	C	A	C
2754/11	NS breeding lines	C	G	A	A	G	T	G	A	G	G	T	T	C	G	C	T	A	T	C	A	C	C	T	A	T	A	T	C	T	G	G	A	A	T	G	C	A	C
329/12	NS breeding lines	C	G	A	A	G	T	G	A	G	G	T	T	C	G	C	T	A	T	C	A	C	C	T	A	T	A	T	C	C	G	G	A	A	T	G	C	A	C
401j1	NS breeding lines	C	G	A	A	G	T	G	A	G	G	T	T	C	G	C	T	A	T	C	A	C	C	T	A	T	A	T	C	C	G	G	A	A	T	G	T	G	C
406j30	NS breeding lines	C	G	A	A	G	T	G	A	G	G	T	T	C	G	C	T	A	T	C	A	C	C	T	A	T	A	T	C	C	G	G	A	A	T	G	T	G	C
71-17	NS breeding lines	C	G	A	A	G	T	G	A	G	G	T	T	C	G	C	T	A	T	C	A	C	C	T	A	T	A	T	C	C	G	G	A	A	T	G	C	A	C
73-15	NS breeding lines	S	R	M	M	G	T	G	A	G	G	T	T	C	G	C	T	A	T	C	A	C	C	T	A	T	A	T	C	C	G	G	A	A	T	G	C	A	C
74-1	NS breeding lines	C	G	A	A	G	T	G	A	G	G	T	T	C	G	C	T	A	T	C	A	C	C	T	A	T	A	G	C	C	G	G	A	A	T	G	T	G	C
75-10	NS breeding lines	C	R	M	M	G	T	G	A	G	G	T	T	C	G	C	T	A	T	C	A	C	C	T	A	T	A	T	C	C	G	G	A	A	T	G	T	G	C
75-4	NS breeding lines	C	G	A	A	G	T	G	A	G	G	T	T	C	G	C	T	A	T	C	A	C	C	T	A	T	A	G	C	C	G	G	A	A	T	G	T	G	C
76-17	NS breeding lines	C	G	A	A	G	T	G	A	G	G	T	T	C	G	C	T	A	T	C	A	C	C	T	A	T	A	T	C	C	G	G	A	A	T	G	C	A	C
9v12	NS breeding lines	C	G	A	A	G	T	G	A	G	G	T	T	C	G	C	T	A	T	C	A	C	C	T	A	T	A	T	C	C	G	G	A	A	T	G	T	G	C
3-16	NS breeding lines	C	G	A	A	G	T	G	A	G	G	T	T	C	G	C	T	A	T	T	G	C	G	A	A	C	G	T	C	C	G	G	A	A	T	G	T	G	C
210479	NS breeding lines	C	G	A	A	A	T	G	A	A	A	G	A	C	G	A	T	G	G	C	A	C	C	T	A	T	A	T	C	C	G	G	A	A	T	G	C	A	C
420135	NS breeding lines	C	G	A	A	G	T	G	A	A	A	G	A	C	G	A	A	G	G	C	A	C	C	T	A	T	A	T	C	C	G	G	A	A	T	G	C	A	C
510008	NS breeding lines	C	G	A	A	G	T	G	A	A	A	G	A	C	G	A	T	G	G	C	A	C	C	T	A	T	A	T	C	C	G	G	A	A	T	G	C	A	C
2788/13	NS breeding lines	C	G	A	A	G	T	G	A	A	A	G	A	C	G	A	T	G	G	C	A	C	C	T	A	T	A	T	C	C	G	G	A	A	T	G	C	A	C
76-18	NS breeding lines	C	G	A	A	G	T	G	A	A	A	G	A	C	G	A	A	G	G	C	A	C	C	T	A	T	A	T	C	C	A	G	A	A	T	G	C	A	C
77-6	NS breeding lines	C	G	A	A	G	A	G	A	A	A	G	A	C	G	A	T	G	G	C	A	C	C	T	A	T	A	T	C	C	G	G	A	A	T	G	C	A	C
76-10	NS breeding lines	C	G	A	A	G	T	G	A	A	A	G	A	C	G	A	T	G	G	T	G	C	G	A	A	C	G	T	C	C	A	G	A	A	T	G	C	A	C
4-13	NS breeding lines	G	A	C	C	G	T	G	A	G	G	T	T	C	G	C	T	A	T	C	A	C	C	T	A	T	A	T	C	C	G	G	A	A	T	G	T	G	C
6-14	NS breeding lines	G	A	C	C	G	T	G	A	G	G	T	T	C	G	C	T	A	T	C	A	C	C	T	A	T	A	T	C	C	A	G	A	A	T	G	C	A	C
9-14	NS breeding lines	G	A	C	C	G	T	G	A	G	G	T	T	C	G	C	T	A	T	C	A	C	C	T	A	T	A	T	C	C	G	G	A	A	T	G	C	A	C
6-15	NS breeding lines	G	A	C	C	G	T	G	A	G	G	T	T	C	G	C	T	A	T	C	A	C	C	T	A	T	A	T	C	T	G	G	A	A	T	G	C	A	C
6-16	NS breeding lines	G	A	C	C	G	T	G	A	G	G	T	T	C	G	C	T	A	T	C	A	C	C	T	A	T	A	T	C	C	G	G	A	A	T	G	C	A	C
9-1	NS breeding lines	G	A	C	C	G	T	G	A	G	G	T	T	C	G	C	T	A	T	C	A	C	C	T	A	T	A	T	C	C	A	G	A	A	T	G	C	A	C
1-2	NS breeding lines	G	A	C	C	G	T	G	A	G	G	T	T	C	G	C	T	A	T	C	A	C	C	T	A	T	A	T	C	C	A	G	A	A	T	G	C	A	C
2-2	NS breeding lines	G	A	C	C	G	T	G	A	G	G	T	T	C	G	C	T	A	T	C	A	C	C	T	A	T	A	T	C	C	G	G	A	A	T	G	C	A	C
7-2	NS breeding lines	G	A	C	C	G	T	G	A	G	G	T	T	C	G	C	T	A	T	C	G	C	C	T	A	C	G	T	C	C	G	G	A	A	T	G	C	A	C
7-3	NS breeding lines	G	A	C	C	G	T	G	A	G	G	T	T	C	G	C	T	A	T	C	G	C	C	T	A	C	G	T	C	C	G	G	A	A	T	G	T	G	C
3-4	NS breeding lines	G	A	C	C	G	T	G	A	G	G	T	T	C	G	C	T	A	T	C	A	C	C	T	C	T	A	T	C	C	G	G	A	A	T	G	C	A	C
5-4	NS breeding lines	G	A	C	C	G	T	G	A	G	G	T	T	C	G	C	T	A	T	C	A	C	C	T	A	T	A	T	C	C	G	G	A	A	T	G	C	A	C
6-4	NS breeding lines	G	A	C	C	G	T	G	A	G	G	T	T	C	G	C	T	A	T	C	G	C	C	T	A	C	G	T	C	C	G	G	A	A	T	G	C	A	C
7-6	NS breeding lines	G	A	C	C	G	T	G	A	G	G	T	T	C	G	C	T	A	T	C	A	C	C	T	A	T	A	T	C	C	G	G	A	A	T	G	C	A	C
4-7	NS breeding lines	G	A	C	C	G	T	G	A	G	G	T	T	C	G	C	T	A	T	T	G	C	C	T	A	C	G	T	C	C	G	G	A	A	T	G	C	A	C
6-9	NS breeding lines	G	A	C	C	G	T	G	A	G	G	T	T	C	G	C	T	A	T	C	A	C	C	T	A	T	A	T	C	T	A	G	A	A	T	G	C	A	C
7-9	NS breeding lines	G	A	C	C	G	T	G	A	G	G	T	T	C	G	C	T	A	T	C	A	C	C	T	A	T	A	T	C	C	G	G	A	A	T	G	C	A	C
6-10	NS breeding lines	G	A	C	C	G	T	G	A	G	G	T	T	C	G	C	T	A	T	C	A	C	C	T	A	T	A	T	C	C	A	G	A	A	T	G	C	A	C
200453	NS breeding lines	G	A	C	C	G	T	G	A	G	G	T	T	C	G	C	T	A	T	C	A	C	C	T	A	T	A	T	C	T	G	G	A	A	T	G	T	A	C
200468	NS breeding lines	G	A	C	C	G	T	G	A	G	G	T	T	C	G	C	T	A	T	C	A	C	C	T	A	T	A	T	C	T	G	G	A	A	T	G	C	A	C
201455	NS breeding lines	G	A	C	C	G	T	G	A	G	G	T	T	C	G	C	T	A	T	C	A	C	C	T	A	T	A	T	C	T	A	G	A	A	T	G	C	A	C
201456	NS breeding lines	G	A	C	C	G	T	G	A	G	G	T	T	C	G	C	T	A	T	C	A	C	C	T	A	T	A	T	C	C	G	G	A	A	T	G	C	A	C
201458	NS breeding lines	G	A	C	C	G	T	G	A	G	G	T	T	C	G	C	T	A	T	C	A	C	C	T	A	T	A	T	C	T	G	G	A	A	T	G	C	A	C
201471	NS breeding lines	G	A	C	C	G	T	G	A	G	G	T	T	C	G	C	T	A	T	C	A	C	C	T	A	T	A	T	C	C	G	G	A	A	T	G	T	G	C
201472	NS breeding lines	G	A	C	C	G	T	G	A	G	G	T	T	C	G	C	T	A	T	C	A	C	C	T	A	T	A	T	C	T	A	G	A	A	T	G	C	A	C
201473	NS breeding lines	G	A	C	C	G	T	G	A	G	G	T	T	C	G	C	T	A	T	C	A	C	C	T	A	T	A	T	C	T	G	G	A	A	T	G	C	A	C
210390	NS breeding lines	G	A	C	C	G	T	G	A	G	G	T	T	C	G	C	T	A	T	C	A	C	C	T	A	T	A	T	C	T	G	G	A	A	T	G	C	A	C
210443	NS breeding lines	G	A	C	C	G	T	G	A	G	G	T	T	C	G	C	T	A	T	C	A	C	C	T	A	T	A	T	C	T	G	G	A	A	T	G	C	A	C
210457	NS breeding lines	G	A	C	C	G	T	G	A	G	G	T	T	C	G	C	T	A	T	C	A	C	C	T	A	T	A	T	C	C	G	G	A	A	T	G	C	A	C
210461	NS breeding lines	G	A	C	C	G	T	G	A	G	G	T	T	C	G	C	T	A	T	C	A	C	C	T	A	T	A	T	C	T	A	G	A	A	T	G	C	A	C
210462	NS breeding lines	G	A	C	C	G	T	G	A	G	G	T	T	C	G	C	T	A	T	C	A	C	C	T	A	T	A	T	C	C	G	G	A	A	T	G	C	A	C
210475	NS breeding lines	G	A	C	C	G	T	G	A	G	G	T	T	C	G	C	T	A	T	C	A	C	C	T	A	T	A	T	C	C	G	G	A	A	T	G	C	A	C
210476	NS breeding lines	G	A	C	C	G	T	G	A	G	G	T	T	C	G	C	T	A	T	C	A	C	C	T	A	T	A	T	C	C	G	G	A	A	T	G	C	A	C
210481	NS breeding lines	G	A	C	C	G	T	G	A	G	G	T	T	C	G	C	T	A	T	C	A	C	C	T	A	T	A	T	C	C	G	G	A	A	T	G	C	A	C
210488	NS breeding lines	G	A	C	C	G	T	G	A	G	G	T	T	C	T	C	T	A	T	C	A	C	C	T	A	T	A	T	C	C	G	G	A	A	T	G	C	A	C
220445	NS breeding lines	G	A	C	C	G	T	G	A	G	G	T	T	C	G	C	T	A	T	C	A	C	C	T	A	T	A	T	C	C	A	G	A	A	T	G	C	A	C
220463	NS breeding lines	G	A	C	C	G	T	G	A	G	G	T	T	C	G	C	T	A	T	C	A	C	C	T	A	T	A	T	C	C	G	G	A	A	T	G	C	A	C
220465	NS breeding lines	G	A	C	C	G	T	G	A	G	G	T	T	C	G	C	T	A	T	C	A	C	C	T	A	T	A	T	C	C	G	G	A	A	T	G	C	A	C
220482	NS breeding lines	G	A	C	C	G	T	G	A	G	G	T	T	C	G	C	T	A	T	C	A	C	C	T	A	T	A	T	C	C	G	G	A	A	T	G	C	A	C
400131	NS breeding lines	G	A	C	C	G	T	G	A	G	G	T	T	C	G	C	T	A	T	C	A	C	C	T	A	T	A	T	C	T	G	G	A	A	T	G	C	A	C
400132	NS breeding lines	G	A	C	C	G	T	G	A	G	G	T	T	C	G	C	T	A	T	C	A	C	C	T	A	T	A	T	C	C	G	G	A	A	T	G	T	G	C
401133	NS breeding lines	G	A	C	C	G	T	G	A	G	G	T	T	C	G	C	T	A	T	C	A	C	C	T	A	T	A	T	C	C	G	G	A	A	T	G	T	G	C
401134	NS breeding lines	G	A	C	C	G	T	G	A	G	G	T	T	C	T	C	T	A	T	C	A	C	C	T	A	T	A	T	C	T	G	G	A	A	T	G	C	A	C
401140	NS breeding lines	G	A	C	C	G	T	G	A	G	G	T	T	C	G	C	T	A	T	C	A	C	C	T	A	T	A	T	C	C	G	G	A	A	T	G	C	A	C
401141	NS breeding lines	G	A	C	C	G	T	G	A	G	G	T	T	C	G	C	T	A	T	C	A	C	C	T	C	T	A	T	C	C	G	G	A	A	T	G	T	G	C
401142	NS breeding lines	G	A	C	C	G	T	G	A	G	G	T	T	C	G	C	T	A	T	C	A	C	C	T	A	T	A	T	C	C	A	G	A	A	T	G	C	A	C
410143	NS breeding lines	G	A	C	C	G	T	G	A	G	G	T	T	C	G	C	T	A	T	C	A	C	C	T	A	T	A	G	C	C	G	G	A	A	T	G	C	A	C
420111	NS breeding lines	G	A	C	C	G	T	G	A	G	G	T	T	C	G	C	T	A	T	C	A	C	C	T	A	T	A	G	C	C	A	G	A	A	T	G	T	G	C
501012	NS breeding lines	G	A	C	C	G	T	G	A	G	G	T	T	C	G	C	T	A	T	C	A	C	C	T	A	T	A	G	C	C	G	G	A	A	T	G	C	A	C
501014	NS breeding lines	G	A	C	C	G	T	G	A	G	G	T	T	C	G	C	T	A	T	C	A	C	C	T	A	T	A	T	C	C	G	G	A	A	T	G	C	A	C
501022	NS breeding lines	G	A	C	C	G	T	G	A	G	G	T	T	C	G	C	T	A	T	C	A	C	C	T	A	T	A	G	C	C	G	G	A	A	T	G	C	A	C
510025	NS breeding lines	G	A	C	C	G	T	G	A	G	G	T	T	C	G	C	T	A	T	C	A	C	C	T	A	T	A	T	C	C	G	G	A	A	T	G	C	A	C
510026	NS breeding lines	G	A	C	C	G	T	G	A	G	G	T	T	C	G	C	T	A	T	C	A	C	C	T	A	T	A	T	C	C	G	G	A	A	T	G	C	A	C
520018	NS breeding lines	G	A	C	C	G	T	G	A	G	G	T	T	C	G	C	T	A	T	C	A	C	C	T	A	T	A	T	C	C	G	G	A	A	T	G	C	A	C
520019	NS breeding lines	G	A	C	C	G	T	G	A	G	G	T	T	C	G	C	T	A	T	C	A	C	C	T	A	T	A	T	C	C	G	G	A	A	T	G	C	A	C
520020	NS breeding lines	G	A	C	C	G	T	G	A	G	G	T	T	C	G	C	T	A	T	C	A	C	C	T	A	T	A	T	C	C	G	G	A	A	T	G	C	A	C
520038	NS breeding lines	G	A	C	C	G	T	G	A	G	G	T	T	C	G	C	T	A	T	C	G	C	C	T	A	C	G	G	C	T	G	G	A	A	T	G	C	A	C
520039	NS breeding lines	G	A	C	C	G	T	G	A	G	G	T	T	C	G	C	T	A	T	C	G	C	C	T	A	C	G	T	C	C	A	G	A	A	T	G	C	A	C
520041	NS breeding lines	G	A	C	C	G	T	G	A	G	G	T	T	C	G	C	T	A	T	C	A	C	C	T	A	T	A	T	C	C	G	G	A	A	T	G	T	G	C
520042	NS breeding lines	G	A	C	C	G	T	G	A	G	G	T	T	C	G	C	T	A	T	C	G	C	C	T	A	C	G	T	C	C	G	G	A	A	T	G	C	A	C
530045	NS breeding lines	G	A	C	C	G	T	G	A	G	G	T	T	C	G	C	T	A	T	C	G	C	C	T	A	C	G	T	C	C	G	G	A	A	T	G	C	A	C
10v2	NS breeding lines	G	A	C	C	G	T	G	A	G	G	T	T	C	G	C	T	A	T	C	A	C	C	T	A	T	A	T	C	C	A	G	A	A	T	G	T	G	C
1135/13	NS breeding lines	G	A	C	C	G	T	G	A	G	G	T	T	C	G	C	T	A	T	C	A	C	C	T	A	T	A	T	C	C	A	G	A	A	T	G	C	A	C
11v1	NS breeding lines	G	A	C	C	A	T	G	A	G	G	T	T	C	G	C	T	A	T	C	A	C	C	T	A	T	A	T	C	T	A	G	A	A	T	G	C	A	C
11v5	NS breeding lines	G	A	C	C	A	T	G	A	G	G	T	T	C	G	C	T	A	T	C	A	C	C	T	A	T	A	T	C	C	G	G	A	A	T	G	C	A	C
1421/13	NS breeding lines	G	A	C	C	G	T	G	A	G	G	T	T	C	G	C	T	A	T	C	A	C	C	T	A	T	A	T	C	C	G	G	A	A	T	G	C	A	C
1590/12	NS breeding lines	G	A	C	C	G	T	G	A	G	G	T	T	C	G	C	T	A	T	C	A	C	C	T	A	T	A	T	C	C	A	G	A	A	T	G	C	A	C
1600/13	NS breeding lines	G	A	C	C	G	T	G	A	G	G	T	T	C	G	C	T	A	T	C	G	C	C	T	A	C	G	T	C	C	G	G	A	A	T	G	C	A	C
1v2	NS breeding lines	G	A	C	C	G	T	G	A	G	G	T	T	C	G	C	T	A	T	C	G	C	C	T	A	C	G	T	C	C	G	G	A	A	T	G	C	A	C
1v3	NS breeding lines	G	A	C	C	G	T	G	A	G	G	T	T	C	G	C	T	A	T	C	A	C	C	T	A	T	A	T	C	T	A	G	A	A	T	G	C	A	C
237/12	NS breeding lines	G	A	C	C	G	T	G	A	G	G	T	T	C	G	C	T	A	T	C	A	C	C	T	A	T	A	T	C	C	G	G	A	A	T	G	C	A	C
2423/13	NS breeding lines	G	A	C	C	G	T	G	A	G	G	T	T	C	G	C	T	A	T	C	A	C	C	T	A	T	A	T	C	C	G	G	A	A	T	G	C	A	C
252/12	NS breeding lines	G	A	C	C	G	T	G	A	G	G	T	T	C	G	C	T	A	T	C	A	C	C	T	A	T	A	T	C	C	G	G	A	A	T	G	C	A	C
2617/13	NS breeding lines	G	A	C	C	G	T	G	A	G	G	T	T	C	G	C	T	A	T	C	A	C	C	T	A	T	A	T	C	C	A	G	A	A	T	G	C	A	C
2693/12	NS breeding lines	G	A	C	C	G	T	G	A	G	G	T	T	C	G	C	T	A	T	C	A	C	C	T	A	T	A	T	C	C	G	G	A	A	T	G	C	A	C
28/13	NS breeding lines	G	A	C	C	G	T	G	A	G	G	T	T	C	G	C	T	A	T	C	A	C	C	T	A	T	A	T	C	C	G	G	A	A	T	G	T	G	C
2829/12	NS breeding lines	G	A	C	C	G	T	G	A	G	G	T	T	C	G	C	T	A	T	C	A	C	C	T	A	T	A	T	C	T	G	G	A	A	T	G	C	A	C
327/13	NS breeding lines	G	A	C	C	G	T	G	A	G	G	T	T	C	G	C	T	A	T	T	G	C	C	T	A	C	G	T	C	C	A	G	A	A	T	G	C	A	C
3v3	NS breeding lines	G	A	C	C	A	T	G	A	G	G	T	T	C	G	C	T	A	T	C	A	C	C	T	A	T	A	T	C	C	G	G	A	A	T	G	C	A	C
3v6	NS breeding lines	G	A	C	C	G	T	G	A	G	G	T	T	C	G	C	T	A	T	C	A	C	C	T	A	T	A	T	C	C	G	G	A	A	T	G	C	A	C
3v9	NS breeding lines	G	A	C	C	G	T	G	A	G	G	T	T	C	G	C	T	G	T	C	A	C	C	T	A	T	A	T	C	C	G	G	A	A	T	G	C	A	C
401j16	NS breeding lines	G	A	C	C	G	T	G	A	G	G	T	T	C	G	C	T	A	T	C	A	C	C	T	A	T	A	T	C	C	G	G	A	A	T	G	C	A	C
401j2	NS breeding lines	G	A	C	C	G	T	G	A	G	G	T	T	C	G	C	T	A	T	C	A	C	C	T	A	T	A	T	C	T	G	G	A	A	T	G	C	A	C
401j24	NS breeding lines	G	A	C	C	G	T	G	A	G	G	T	T	C	G	C	T	A	T	C	A	C	C	T	A	T	A	T	C	T	G	G	A	A	T	G	C	A	C
401j26	NS breeding lines	G	A	C	C	G	T	G	A	G	G	T	T	C	G	C	T	A	T	C	A	C	C	T	A	T	A	T	C	T	G	G	A	A	T	G	C	A	C
401j3	NS breeding lines	G	A	C	C	G	T	G	A	G	G	T	T	C	G	C	T	A	T	C	A	C	C	T	A	T	A	T	C	C	A	G	A	A	T	G	T	G	C
402j1	NS breeding lines	G	A	C	C	G	T	G	A	G	G	T	T	C	G	C	T	A	T	C	A	C	C	T	A	T	A	T	C	T	A	G	A	A	T	G	C	A	C
402j3	NS breeding lines	G	A	C	C	G	T	G	A	G	G	T	T	C	G	C	T	A	T	C	A	C	C	T	A	T	A	T	C	C	G	G	A	A	T	G	C	A	C
403j17	NS breeding lines	G	A	C	C	G	T	G	A	G	G	T	T	C	G	C	T	A	T	C	A	C	C	T	A	T	A	T	C	C	A	G	A	A	T	G	C	A	C
403j33	NS breeding lines	G	A	C	C	G	T	G	A	G	G	T	T	C	G	C	T	A	T	C	A	C	C	T	A	T	A	T	C	C	G	G	A	A	T	G	C	A	C
403j35	NS breeding lines	G	A	C	C	G	T	G	A	G	G	T	T	C	G	C	T	A	T	C	G	C	C	T	A	C	G	T	C	C	G	G	A	A	T	G	C	A	C
404j16	NS breeding lines	G	A	C	C	A	T	G	A	G	G	T	T	C	G	C	T	A	T	C	A	C	C	T	A	T	A	T	C	T	G	G	A	A	T	G	C	A	C
405j33	NS breeding lines	G	A	C	C	G	T	G	A	G	G	T	T	C	G	C	T	A	T	C	A	C	C	T	A	T	A	T	C	C	G	G	A	A	T	G	C	A	C
5v15	NS breeding lines	G	A	C	C	G	T	G	A	G	G	T	T	C	G	C	T	A	T	C	A	C	C	T	A	T	A	T	C	C	A	G	A	A	T	G	C	A	C
5v17	NS breeding lines	G	A	C	C	G	T	G	A	G	G	T	T	C	G	C	T	A	T	C	G	C	C	T	A	C	G	T	C	T	A	G	A	A	T	G	C	A	C
690/13	NS breeding lines	G	A	C	C	G	T	G	A	G	G	T	T	C	G	C	T	A	T	C	A	C	C	T	A	T	A	T	C	T	G	G	A	A	T	G	C	A	C
6v5	NS breeding lines	G	A	C	C	G	T	G	A	G	G	T	T	C	G	C	T	A	T	C	A	C	C	T	A	T	A	T	C	T	A	G	A	A	T	G	C	A	C
71-11	NS breeding lines	G	A	C	C	G	T	G	A	G	G	T	T	C	G	C	T	A	T	C	A	C	C	T	A	T	A	T	C	C	G	G	A	A	T	G	C	A	C
71-14	NS breeding lines	G	A	C	C	G	T	G	A	G	G	T	T	C	G	C	T	A	T	C	A	C	C	T	A	T	A	T	C	C	G	G	A	A	T	G	T	G	C
71-15	NS breeding lines	G	A	C	C	G	T	G	A	G	G	T	T	C	G	C	T	A	T	C	A	C	C	T	A	T	A	T	C	C	G	G	A	A	T	G	C	A	C
71-18	NS breeding lines	C	G	A	A	G	T	G	A	G	G	T	T	C	G	C	T	A	T	C	A	C	C	T	A	T	A	T	C	C	G	G	A	A	T	G	C	A	C
71-5	NS breeding lines	G	A	C	C	G	T	G	A	G	G	T	T	C	G	C	T	A	T	C	A	C	C	T	A	T	A	T	C	C	G	G	A	A	T	G	C	A	C
71-6	NS breeding lines	G	A	C	C	G	T	G	A	G	G	T	T	C	G	C	T	A	T	C	A	C	C	T	A	T	A	T	C	C	G	G	A	A	T	G	T	G	C
72-6	NS breeding lines	G	A	C	C	G	T	G	A	G	G	T	T	C	G	C	T	A	T	C	A	C	C	T	A	T	A	T	C	C	G	G	A	A	T	G	T	G	C
73-17	NS breeding lines	G	A	C	C	G	T	G	A	G	G	T	T	C	G	C	T	A	T	C	A	C	C	T	A	T	A	T	C	C	G	G	A	A	T	G	T	G	C
73-18	NS breeding lines	C	G	A	A	G	T	G	A	G	G	T	T	C	G	C	T	A	T	C	A	C	C	T	A	T	A	T	C	C	G	G	A	A	T	G	T	G	C
75-3	NS breeding lines	G	A	C	C	G	T	G	A	G	G	T	T	C	G	C	T	A	T	C	A	C	C	T	A	T	A	T	C	C	G	G	A	A	T	G	C	A	C
76-5	NS breeding lines	G	A	C	C	G	T	G	A	G	G	T	T	C	G	C	T	A	T	C	A	C	C	T	A	T	A	T	C	C	A	G	A	A	T	G	C	A	C
76-8	NS breeding lines	G	A	C	C	G	T	G	A	G	G	T	T	C	G	C	T	A	T	C	A	C	C	T	A	T	A	T	C	C	G	G	A	A	T	G	C	A	C
77-13	NS breeding lines	G	A	C	C	G	T	G	A	G	G	T	T	C	G	C	T	A	T	C	A	C	C	T	A	T	A	T	C	C	G	G	A	A	T	G	T	G	C
8v4	NS breeding lines	G	A	C	C	G	T	G	A	G	G	T	T	C	G	C	T	A	T	C	A	C	C	T	A	T	A	T	C	C	A	G	A	A	T	G	C	A	C
8v8	NS breeding lines	G	A	C	C	G	T	G	A	G	G	T	T	C	G	C	T	A	T	C	A	C	C	T	A	T	A	T	C	C	G	G	A	A	T	G	C	A	C
985/11	NS breeding lines	G	A	C	C	G	T	G	A	G	A	T	T	C	G	C	T	A	T	C	A	C	C	T	A	T	A	T	C	C	G	G	A	A	T	G	C	A	C
3-15	NS breeding lines	G	A	C	C	G	T	G	A	G	G	T	T	C	G	C	T	A	T	T	G	C	G	A	A	C	G	T	C	C	G	G	A	A	T	G	C	A	C
5-17	NS breeding lines	G	A	C	C	G	T	G	A	G	G	T	T	C	G	C	T	A	T	T	G	C	G	A	A	C	G	T	C	C	G	G	A	A	T	G	T	G	C
4-9	NS breeding lines	G	A	C	C	G	T	G	A	G	G	T	T	C	G	C	T	A	T	T	G	C	G	A	A	C	G	T	C	T	A	G	A	A	T	G	C	A	C
5-11	NS breeding lines	G	A	C	C	G	T	G	A	G	G	T	T	C	G	C	T	A	T	C	A	G	G	A	A	C	G	T	C	C	G	G	A	A	T	G	C	A	C
200452	NS breeding lines	G	A	C	C	G	T	G	A	G	G	T	T	C	G	C	T	A	T	T	G	C	G	A	A	C	G	T	C	T	G	G	A	A	T	G	C	A	C
200469	NS breeding lines	G	A	C	C	G	T	G	A	G	G	T	T	C	G	C	T	A	T	T	G	C	G	A	A	C	G	T	C	T	G	G	A	A	T	G	C	A	C
201440	NS breeding lines	G	A	C	C	G	T	G	A	G	G	T	T	C	G	C	T	A	T	T	G	C	G	A	A	C	G	G	C	C	G	G	A	A	T	G	C	A	C
500021	NS breeding lines	G	A	C	C	G	T	G	A	G	G	T	T	C	G	C	T	A	T	T	G	C	G	A	A	C	G	T	C	T	A	G	A	A	T	G	C	A	C
500032	NS breeding lines	G	A	C	C	G	T	G	A	G	G	T	T	C	G	C	T	A	T	T	G	C	G	A	A	C	G	T	C	C	A	G	A	A	T	G	C	A	C
520036	NS breeding lines	G	A	C	C	G	T	G	A	G	G	T	T	C	G	C	T	A	T	T	G	C	G	A	A	C	G	T	C	C	G	G	A	A	T	G	C	A	C
1928/13	NS breeding lines	G	A	C	C	G	T	G	A	G	G	T	T	C	G	C	T	A	T	T	G	C	G	A	A	C	G	T	C	C	G	G	A	A	T	G	C	A	C
1v11	NS breeding lines	G	A	C	C	A	T	G	A	G	G	T	T	C	G	C	T	A	T	T	G	C	G	A	A	C	G	T	C	T	G	G	A	A	T	G	C	A	C
1v5	NS breeding lines	G	A	C	C	A	T	G	A	G	G	T	T	C	G	C	T	A	T	T	G	C	G	A	A	C	G	T	C	C	G	G	A	A	T	G	C	A	C
1v7	NS breeding lines	G	A	C	C	A	T	G	A	G	G	T	T	C	G	C	T	A	T	T	G	C	G	A	A	C	G	T	C	C	G	G	A	A	T	G	T	G	C
1v9	NS breeding lines	G	A	C	C	G	T	G	A	G	G	T	T	C	G	C	T	A	T	T	G	C	G	A	A	C	G	T	C	C	G	G	A	A	T	G	C	A	C
370/13	NS breeding lines	G	A	C	C	G	T	G	A	G	G	T	T	C	G	C	T	A	T	T	G	C	G	A	A	C	G	T	C	T	G	G	A	A	T	G	C	A	C
401j10	NS breeding lines	G	A	C	C	G	T	G	A	G	G	T	T	C	G	C	T	A	T	T	G	C	G	A	A	C	G	T	C	T	A	G	A	A	T	A	T	G	C
401j12	NS breeding lines	G	A	C	C	G	T	G	A	G	G	T	T	C	G	C	T	A	T	T	G	C	G	A	A	C	G	T	C	C	G	G	A	A	T	G	T	G	C
402j29	NS breeding lines	G	A	C	C	G	T	G	A	G	G	T	T	C	G	C	T	A	T	C	A	G	G	A	A	C	G	T	C	T	A	G	A	A	T	G	C	A	C
402j30	NS breeding lines	G	A	C	C	G	T	G	A	G	G	T	T	C	G	C	T	A	T	C	A	G	G	A	A	C	G	T	C	C	A	G	A	A	T	G	C	A	C
403j5	NS breeding lines	G	A	C	C	G	T	G	A	G	G	T	T	C	G	C	T	A	T	C	A	G	G	A	A	C	G	T	C	C	G	G	A	A	T	G	C	A	C
6v8	NS breeding lines	G	A	C	C	G	T	G	A	G	G	T	T	C	G	C	T	A	T	T	G	C	G	A	A	C	G	T	C	C	G	G	A	A	T	G	C	A	C
71-13	NS breeding lines	G	A	C	C	G	T	G	A	G	G	T	T	C	G	C	T	A	T	T	G	C	G	A	A	C	G	T	C	T	A	G	A	A	T	G	C	A	C
71-7	NS breeding lines	G	A	C	C	G	T	G	A	G	G	T	T	C	G	C	T	A	T	T	G	C	G	A	A	C	G	T	C	C	G	G	A	A	T	G	C	A	C
72-1	NS breeding lines	G	A	C	C	G	T	G	A	G	G	T	T	C	G	C	T	A	T	T	G	C	G	A	A	C	G	T	C	C	G	G	A	A	T	G	C	A	C
72-2	NS breeding lines	G	A	C	C	G	T	G	A	G	G	T	T	C	G	C	T	A	T	T	G	C	G	A	A	C	G	T	C	C	G	G	A	A	T	G	C	A	C
72-5	NS breeding lines	G	A	C	C	G	T	G	A	G	G	T	T	C	G	C	T	A	T	T	G	C	G	A	A	C	G	T	C	C	G	G	A	A	T	G	C	A	C
85/13	NS breeding lines	G	A	C	C	G	T	G	A	G	G	T	T	C	G	C	T	A	T	T	G	C	G	A	A	C	G	T	C	T	A	G	A	A	T	G	C	A	C
9v4	NS breeding lines	G	A	C	C	G	T	G	A	G	G	T	T	C	G	C	T	A	T	C	G	C	G	A	A	C	G	T	C	T	G	G	A	A	T	G	C	A	C
11-2	NS breeding lines	G	A	C	C	G	T	G	A	A	A	G	A	C	G	A	T	G	G	C	A	C	C	T	A	T	A	T	C	T	G	G	A	A	T	G	C	A	C
9-12	NS breeding lines	G	A	C	C	G	T	G	A	A	A	G	A	C	G	A	T	G	G	C	A	C	C	T	A	T	A	T	C	C	G	G	A	A	T	G	C	A	C
210477	NS breeding lines	G	A	C	C	G	T	G	A	A	A	G	A	C	G	A	T	G	G	C	A	C	C	T	A	T	A	T	C	T	G	G	A	A	T	G	C	A	C
210478	NS breeding lines	G	A	C	C	G	T	G	A	A	A	G	A	C	G	A	T	G	G	C	A	C	C	T	A	T	A	T	C	C	G	G	A	A	T	G	C	A	C
210480	NS breeding lines	G	A	C	C	G	T	G	A	A	A	G	A	C	G	A	A	G	G	C	A	C	C	T	A	T	A	T	C	C	G	G	A	A	T	G	C	A	C
220433	NS breeding lines	G	A	C	C	G	T	G	A	A	A	G	A	C	G	A	T	G	G	C	A	C	C	T	A	T	A	T	C	C	G	G	A	A	T	G	C	A	C
220483	NS breeding lines	G	A	C	C	G	T	G	A	A	A	G	A	C	G	A	T	G	G	T	G	C	C	T	A	C	G	T	C	C	G	G	A	A	T	G	C	A	C
220484	NS breeding lines	G	A	C	C	G	T	G	A	A	A	G	A	C	G	A	T	G	G	C	A	C	C	T	A	T	A	T	C	C	G	G	A	A	T	G	C	A	C
220485	NS breeding lines	G	A	C	C	G	T	G	A	A	A	G	A	C	G	A	T	G	G	C	A	C	C	T	A	T	A	T	C	C	G	G	A	A	T	G	C	A	C
230435	NS breeding lines	G	A	C	C	G	T	G	A	A	A	G	A	C	G	A	T	G	G	C	A	C	C	T	A	T	A	T	C	T	A	G	A	A	T	G	C	A	C
230450	NS breeding lines	G	A	C	C	G	T	G	A	A	A	G	A	C	G	A	T	G	G	C	A	C	C	T	A	T	A	T	C	C	G	G	A	A	T	G	C	A	C
230467	NS breeding lines	G	A	C	C	G	T	G	A	A	A	G	A	C	G	A	T	G	G	C	A	C	C	T	A	T	A	T	C	T	A	G	A	A	T	G	C	A	C
230486	NS breeding lines	G	A	C	C	G	T	G	A	A	A	G	A	C	G	A	T	G	G	C	A	C	C	T	A	T	A	T	C	C	G	G	A	A	T	G	C	A	C
230487	NS breeding lines	G	A	C	C	G	T	G	A	A	A	G	A	C	G	A	T	G	G	C	A	C	C	T	A	T	A	T	C	T	G	G	A	A	T	G	C	A	C
420136	NS breeding lines	G	A	C	C	G	T	G	A	A	A	G	A	C	G	A	T	G	G	C	A	C	C	T	A	T	A	T	C	C	G	G	A	A	T	G	T	G	C
420137	NS breeding lines	G	A	C	C	G	T	G	A	A	A	G	A	C	G	A	T	G	G	C	A	C	C	T	A	T	A	T	C	T	A	G	A	A	T	G	C	A	C
510007	NS breeding lines	G	A	C	C	G	T	G	A	A	A	G	A	C	G	A	T	G	G	C	A	C	C	T	A	T	A	T	C	C	A	G	A	A	T	G	C	A	C
510016	NS breeding lines	G	A	C	C	G	T	G	A	A	A	G	A	C	G	A	T	G	G	C	A	C	C	T	A	T	A	T	C	C	G	G	A	A	T	G	C	A	C
510024	NS breeding lines	G	A	C	C	G	T	G	A	A	A	G	A	C	G	A	T	G	G	T	G	C	C	T	A	C	G	T	C	C	G	G	A	A	T	G	C	A	C
520029	NS breeding lines	G	A	C	C	G	T	G	A	A	A	G	A	C	G	A	T	G	G	C	G	C	C	T	A	C	G	T	C	C	G	G	A	A	T	G	C	A	C
520030	NS breeding lines	G	A	C	C	G	T	G	A	A	A	G	A	C	G	A	T	G	G	C	G	C	C	T	A	C	G	T	C	C	G	G	A	A	T	G	C	A	C
10v1	NS breeding lines	G	A	C	C	G	T	G	A	A	A	G	A	C	G	A	T	G	G	C	A	C	C	T	A	T	A	T	C	T	G	G	A	A	T	G	C	A	C
1537/12	NS breeding lines	G	A	C	C	G	T	G	A	A	A	G	A	C	G	A	T	G	G	C	A	C	C	T	A	T	A	T	C	T	G	G	A	A	T	G	C	A	C
1542/13	NS breeding lines	G	A	C	C	G	T	G	A	A	A	G	A	C	G	A	T	G	G	C	A	C	C	T	A	T	A	T	C	C	G	G	A	A	T	G	C	A	C
1728/12	NS breeding lines	G	A	C	C	A	T	G	A	A	A	G	A	C	G	A	T	G	G	C	A	C	C	T	A	T	A	T	C	C	G	G	A	A	T	G	C	A	C
405j6	NS breeding lines	G	A	C	C	G	T	G	A	A	A	G	A	C	G	A	T	G	G	C	A	C	C	T	A	T	A	T	C	C	G	G	A	A	T	G	C	A	C
405j7	NS breeding lines	G	A	C	C	G	T	G	A	A	A	G	A	C	G	A	T	G	G	C	A	C	C	T	A	T	A	T	C	C	G	G	A	A	T	G	C	A	C
5-13	NS breeding lines	G	A	C	C	G	T	G	A	A	A	G	A	C	G	A	T	G	G	T	G	C	G	A	A	C	G	T	C	C	G	G	A	A	T	G	C	A	C
5-14	NS breeding lines	G	A	C	C	G	T	G	A	A	A	G	A	C	G	A	T	G	G	T	G	C	G	A	A	C	G	T	C	C	G	G	A	A	T	G	C	A	C
10-2	NS breeding lines	G	A	C	C	G	T	G	A	A	A	G	A	C	G	A	T	G	G	T	G	C	G	A	A	C	G	T	C	T	G	G	A	A	T	G	C	A	C
3-12	NS breeding lines	G	A	C	C	G	T	G	A	A	A	G	A	C	G	A	T	G	G	T	G	C	G	A	A	C	G	T	C	C	G	G	A	A	T	G	C	A	C
5-12	NS breeding lines	G	A	C	C	G	T	G	A	A	A	G	A	C	G	A	T	G	G	T	G	C	G	A	A	C	G	T	C	C	G	G	A	A	T	G	C	A	C
200454	NS breeding lines	G	A	C	C	G	T	G	A	A	A	G	A	C	G	A	T	G	G	T	G	C	G	A	A	C	G	T	C	C	G	G	A	A	T	G	C	A	C
210391	NS breeding lines	G	A	C	C	G	T	G	A	A	A	G	A	C	G	A	T	G	G	T	G	C	G	A	A	C	G	T	C	C	G	G	A	A	T	G	C	A	C
210459	NS breeding lines	G	A	C	C	G	T	G	A	A	A	G	A	C	G	A	T	G	G	T	G	C	G	A	A	C	G	T	C	C	G	G	A	A	T	G	C	A	C
210474	NS breeding lines	G	A	C	C	G	T	G	A	A	A	G	A	C	G	A	T	G	G	T	G	C	G	A	A	C	G	T	C	C	G	G	A	A	T	G	T	G	C
220412	NS breeding lines	G	A	C	C	G	T	G	A	A	A	G	A	C	G	A	T	G	G	T	G	C	G	A	A	C	G	T	C	T	A	G	A	A	T	G	C	A	C
220434	NS breeding lines	G	A	C	C	G	T	G	A	A	A	G	A	C	G	A	A	G	G	T	G	C	G	A	A	C	G	T	C	C	G	G	A	A	T	G	C	A	C
220444	NS breeding lines	G	A	C	C	G	T	G	A	A	A	G	A	C	G	A	T	G	G	T	G	C	G	A	A	C	G	T	C	C	G	G	A	A	T	G	T	G	C
420074	NS breeding lines	G	A	C	C	A	T	G	A	A	A	G	A	C	G	A	T	G	G	T	G	C	G	A	A	C	G	T	C	C	G	G	A	A	T	G	T	G	C
420103	NS breeding lines	G	A	C	C	G	T	G	A	A	A	G	A	C	G	A	T	G	G	T	G	C	G	A	A	C	G	T	C	T	G	G	A	A	T	G	C	A	C
420104	NS breeding lines	G	A	C	C	G	T	G	A	A	A	G	A	C	G	A	T	G	G	T	G	C	G	A	A	C	G	T	C	T	A	G	A	A	T	G	C	A	C
420113	NS breeding lines	G	A	C	C	G	T	G	A	A	A	G	A	C	G	A	T	G	G	T	G	C	G	A	A	C	G	T	C	C	G	G	A	A	T	G	C	A	C
501005	NS breeding lines	G	A	C	C	G	T	G	A	A	A	G	A	C	G	A	T	G	G	T	G	C	G	A	A	C	G	T	C	C	G	G	A	A	T	G	C	A	C
501011	NS breeding lines	G	A	C	C	G	T	G	A	A	A	G	A	C	G	A	T	G	G	T	G	C	G	A	A	C	G	T	C	T	G	G	A	A	T	G	C	A	C
510015	NS breeding lines	G	A	C	C	G	T	G	A	A	A	G	A	C	G	A	T	G	G	T	G	C	G	A	A	C	G	T	C	T	G	G	A	A	T	G	C	A	C
510017	NS breeding lines	G	A	C	C	G	T	G	A	A	A	G	A	C	G	A	T	G	G	T	G	C	G	A	A	C	G	T	C	C	G	G	A	A	T	G	C	A	C
510034	NS breeding lines	G	A	C	C	G	T	G	A	A	A	G	A	C	G	A	A	G	G	T	G	C	G	A	A	C	G	T	C	C	G	G	A	A	T	G	C	A	C
520027	NS breeding lines	G	A	C	C	G	T	G	A	A	A	G	A	C	G	A	T	G	G	T	G	C	G	A	A	C	G	T	C	C	G	G	A	A	T	G	C	A	C
820079	NS breeding lines	G	A	C	C	A	T	G	A	A	A	G	A	C	G	A	T	G	G	T	G	C	G	A	A	C	G	T	C	C	G	G	A	A	T	G	T	G	C
403j4	NS breeding lines	G	A	C	C	G	T	G	A	A	A	G	A	C	G	A	T	G	G	C	A	G	G	A	A	C	G	T	C	C	G	G	A	A	T	G	C	A	C
404j17	NS breeding lines	G	A	C	C	G	T	G	A	A	A	G	A	C	G	A	T	G	G	C	A	G	G	A	A	C	G	T	C	C	G	G	A	A	T	G	C	A	C
74-4	NS breeding lines	G	A	C	C	G	T	G	A	A	A	G	A	C	G	A	T	G	G	T	G	C	G	A	A	C	G	T	C	C	A	G	A	A	T	G	C	A	C
75-2	NS breeding lines	G	A	C	C	G	T	G	A	A	A	G	A	C	G	A	T	G	G	T	G	C	G	A	A	C	G	T	C	C	G	G	A	A	T	G	T	G	C
76-2	NS breeding lines	G	A	C	C	G	T	G	A	A	A	G	A	C	G	A	T	G	G	T	G	C	G	A	A	C	G	T	C	C	G	G	A	A	T	G	C	A	C
8v13	NS breeding lines	G	A	C	C	G	T	G	A	A	A	G	A	C	G	A	T	G	G	T	G	C	G	A	A	C	G	T	C	T	A	G	A	A	T	G	C	A	C
500031	NS breeding lines	G	A	C	C	G	T	A	G	A	A	G	A	C	G	A	T	G	G	T	G	C	G	A	A	C	G	G	C	C	G	G	A	A	T	G	T	G	C
Sumatra	European varieties	C	G	A	A	A	T	G	A	A	A	G	A	C	G	A	T	G	G	C	A	C	C	T	A	T	A	T	C	T	A	G	A	A	T	G	T	G	C
Luna	European varieties	G	A	C	C	G	T	G	A	A	A	G	A	C	G	A	A	G	G	C	A	C	C	T	A	T	A	T	C	C	G	G	A	A	T	G	C	A	C
Fasto	European varieties	G	A	C	C	G	T	G	A	A	A	G	A	C	G	A	T	G	G	C	A	C	C	T	A	T	A	T	C	C	G	G	A	A	T	G	C	A	C
Fortezza	European varieties	G	A	C	C	G	T	G	A	A	A	G	A	C	G	A	T	G	G	C	G	C	C	T	A	C	G	T	C	C	G	G	A	A	T	G	T	G	C
Astafor	European varieties	G	A	C	C	G	T	G	A	A	A	G	A	C	G	A	T	G	G	T	G	C	G	A	A	C	G	T	C	C	A	G	A	A	T	G	C	A	C
Blankas	European varieties	G	A	C	C	G	T	G	A	A	A	G	A	C	G	A	T	G	G	T	G	C	G	A	A	C	G	T	C	T	G	G	A	A	T	G	C	A	C
Dekabig	European varieties	G	A	C	C	G	T	G	A	A	A	G	A	C	G	A	T	G	G	T	G	C	G	A	A	C	G	T	C	C	G	G	A	A	T	G	C	A	C
Ecudor	European varieties	G	A	C	C	G	T	G	A	A	A	G	A	C	G	A	T	G	G	T	G	C	G	A	A	C	G	T	C	C	G	G	A	A	T	G	C	A	C
Hilario	European varieties	G	A	C	C	G	T	G	A	G	G	T	T	C	G	C	T	A	T	C	A	C	C	T	A	T	A	T	C	T	A	G	A	A	T	G	C	A	C
Isidor	European varieties	G	A	C	C	A	T	G	A	G	G	T	T	C	G	C	T	A	T	C	G	C	C	T	A	C	G	T	C	T	G	G	A	A	T	G	C	A	C
ES Mentor	European varieties	G	A	C	C	G	T	A	G	G	G	T	T	C	G	C	T	A	T	C	A	C	C	T	A	T	A	T	C	C	G	G	A	A	T	G	T	G	C
KVP1463	high-protein genotypes	C	G	A	A	G	T	G	A	G	G	T	T	C	G	C	T	A	T	C	A	C	C	T	A	T	A	T	C	T	A	G	A	A	T	G	C	A	C
KVP1451	high-protein genotypes	G	A	C	C	A	T	G	A	G	G	T	T	C	G	C	T	A	T	C	G	C	C	T	A	C	G	T	C	C	G	G	A	A	T	G	C	A	C
KVP1452	high-protein genotypes	G	A	C	C	A	T	G	A	G	G	T	T	C	G	C	T	A	T	C	A	C	C	T	A	T	A	T	C	C	G	G	A	A	T	G	C	A	C
KVP1453	high-protein genotypes	G	A	C	C	G	T	G	A	G	G	T	T	C	G	C	T	A	T	C	A	C	C	T	A	C	G	T	C	C	G	G	A	A	T	G	C	A	C
KVP1454	high-protein genotypes	G	A	C	C	G	T	G	A	G	G	T	T	C	G	C	T	A	T	C	A	C	C	T	A	T	A	T	C	C	G	G	A	A	T	G	C	A	C
KVP1455	high-protein genotypes	G	A	C	C	G	T	G	A	G	G	T	T	C	G	C	T	A	T	C	G	C	C	T	A	C	G	T	C	T	G	G	A	A	T	G	C	A	C
KVP1456	high-protein genotypes	G	A	C	C	G	T	G	A	G	G	T	T	C	G	C	T	A	T	C	G	C	C	T	A	C	G	T	C	C	G	G	A	A	T	G	C	A	C
KVP1457	high-protein genotypes	G	A	C	C	G	T	G	A	G	G	T	T	C	G	C	T	A	T	C	A	C	C	T	A	T	A	T	C	C	G	G	A	A	T	G	C	A	C
KVP1458	high-protein genotypes	G	A	C	C	A	T	G	A	G	G	T	T	C	G	C	T	A	T	C	A	C	C	T	A	T	A	T	C	C	G	G	A	A	T	G	C	A	C
KVP1460	high-protein genotypes	G	A	C	C	G	T	G	A	G	G	T	T	C	G	C	T	A	T	C	G	C	C	T	A	C	G	T	C	T	G	G	A	A	T	G	C	A	C
KVP1464	high-protein genotypes	G	A	C	C	G	T	G	A	G	G	T	T	C	G	C	T	A	T	C	A	C	C	T	A	T	A	T	C	C	G	G	A	A	T	G	C	A	C
KVP1467	high-protein genotypes	G	A	C	C	G	T	G	A	G	G	T	T	C	G	C	T	A	T	C	A	C	C	T	A	T	A	T	C	C	G	G	A	A	T	G	C	A	C
KVP1473	high-protein genotypes	G	A	C	C	G	T	G	A	G	G	T	T	C	G	C	T	A	T	C	A	C	C	T	A	T	A	T	C	C	G	G	A	A	T	G	C	A	C
KVP1475	high-protein genotypes	G	A	C	C	A	T	G	A	G	G	T	T	C	G	C	T	A	T	C	A	C	C	T	A	T	A	T	C	C	G	G	A	A	T	G	C	A	C
KVP1476	high-protein genotypes	G	A	C	C	A	T	G	A	G	G	T	T	C	G	C	T	A	T	C	A	C	C	T	A	T	A	T	C	C	G	G	A	A	T	G	C	A	C
KVP1484	high-protein genotypes	G	A	C	C	G	T	G	A	G	G	T	T	C	G	C	T	A	T	C	A	C	C	T	A	T	A	T	C	C	G	G	A	A	T	G	T	G	C
KVP1486	high-protein genotypes	G	A	C	C	G	T	G	A	G	G	T	T	C	G	C	T	A	T	C	A	C	C	T	A	T	A	T	C	C	G	G	A	A	T	G	T	G	C
KVP1490	high-protein genotypes	G	A	C	C	G	T	G	A	G	G	T	T	C	G	C	T	A	T	C	A	C	C	T	A	T	A	T	C	C	G	G	A	A	T	G	C	A	C
KVP1491	high-protein genotypes	G	A	C	C	G	T	G	A	G	G	T	T	C	G	C	T	A	T	T	A	C	C	T	A	T	A	T	C	T	A	G	A	A	T	G	C	A	C
KVP1498	high-protein genotypes	G	A	C	C	G	T	G	A	G	G	T	T	C	G	C	T	A	T	C	A	C	C	T	A	T	A	T	C	C	G	G	A	A	T	G	T	G	C
KVP1504	high-protein genotypes	G	A	C	C	G	T	G	A	G	G	T	T	C	G	C	T	A	T	C	A	C	C	T	A	T	A	T	C	C	A	G	A	A	T	G	C	A	C
KVP1505	high-protein genotypes	G	A	C	C	G	T	G	A	G	G	T	T	C	G	C	T	A	T	C	G	C	C	T	A	C	G	T	C	T	G	G	A	A	T	G	C	A	C
KVP1507	high-protein genotypes	G	A	C	C	G	T	G	A	G	G	T	T	C	G	C	T	A	T	C	G	C	C	T	A	C	G	T	C	C	G	G	A	A	T	G	C	A	C
KVP1509	high-protein genotypes	G	A	C	C	G	T	G	A	G	G	T	T	C	G	C	T	A	T	C	A	C	C	T	A	T	A	T	C	C	G	G	A	A	T	G	T	G	C
KVP1511	high-protein genotypes	G	A	C	C	G	T	G	A	G	G	T	T	C	G	C	T	A	T	C	A	C	C	T	A	T	A	T	C	C	G	G	A	A	T	G	C	A	C
KVP1462	high-protein genotypes	G	A	C	C	G	T	G	A	G	G	T	T	C	G	C	T	A	T	C	A	C	C	T	A	T	A	T	C	T	G	A	G	A	T	G	T	G	T
KVP1471	high-protein genotypes	G	A	C	C	G	T	G	A	G	G	T	T	C	G	C	T	A	T	C	G	C	C	T	A	C	G	T	C	T	G	A	G	A	T	G	T	G	T
KVP1494	high-protein genotypes	G	A	C	C	G	T	G	A	G	G	T	T	C	G	C	T	A	T	C	G	C	C	T	A	C	G	T	C	C	G	A	G	A	T	G	T	G	T
KVP1465	high-protein genotypes	G	A	C	C	A	T	G	A	G	G	T	T	C	G	C	T	A	T	T	G	C	G	A	A	C	G	T	C	T	G	G	A	A	T	G	C	A	C
KVP1466	high-protein genotypes	G	A	C	C	G	T	G	A	G	G	T	T	C	G	C	T	A	T	T	G	C	G	A	A	C	G	T	C	C	G	G	A	A	T	G	C	A	C
KVP1468	high-protein genotypes	G	A	C	C	A	T	G	A	G	G	T	T	C	G	C	T	A	T	T	G	C	G	A	A	C	G	T	C	T	A	G	A	A	T	G	C	A	C
KVP1470	high-protein genotypes	G	A	C	C	G	T	G	A	G	G	T	T	C	G	C	T	A	T	T	G	C	G	A	A	C	G	T	C	C	G	G	A	A	T	G	C	A	C
KVP1477	high-protein genotypes	G	A	C	C	A	T	G	A	G	G	T	T	C	G	C	T	A	T	T	G	C	G	A	A	C	G	T	C	C	G	G	A	A	T	G	C	A	C
KVP1478	high-protein genotypes	G	A	C	C	G	T	G	A	G	G	T	T	C	G	C	T	A	T	T	G	C	G	A	A	C	G	T	C	T	A	G	A	A	T	G	C	A	C
KVP1480	high-protein genotypes	G	A	C	C	G	T	G	A	G	G	T	T	C	G	C	T	A	T	T	G	C	G	A	A	C	G	T	C	T	A	G	A	A	T	G	C	A	C
KVP1482	high-protein genotypes	G	A	C	C	A	T	G	A	G	G	T	T	C	G	C	T	A	T	T	G	C	G	A	A	C	G	T	C	C	G	G	A	A	T	G	C	A	C
KVP1485	high-protein genotypes	G	A	C	C	G	T	G	A	G	G	T	T	C	G	C	T	A	T	T	G	C	G	A	A	C	G	T	C	C	G	G	A	A	T	G	T	G	C
KVP1487	high-protein genotypes	G	A	C	C	G	T	G	A	G	G	T	T	C	G	C	T	A	T	T	G	C	G	A	A	C	G	T	C	T	G	G	A	A	T	G	C	A	C
KVP1493	high-protein genotypes	G	A	C	C	A	T	G	A	G	G	T	T	C	G	C	T	A	T	T	G	C	G	A	A	C	G	T	C	C	G	G	A	A	T	G	C	A	C
KVP1495	high-protein genotypes	G	A	C	C	G	T	G	A	G	G	T	T	C	G	C	T	A	T	C	G	C	G	A	A	C	G	T	C	C	G	G	A	A	T	G	C	A	C
KVP1499	high-protein genotypes	G	A	C	C	G	T	G	A	G	G	T	T	C	G	C	T	A	T	T	G	C	G	A	A	C	G	T	C	C	G	G	A	A	T	G	C	A	C
KVP1503	high-protein genotypes	G	A	C	C	G	T	G	A	G	G	T	T	C	G	C	T	A	T	T	G	C	G	A	A	C	G	T	C	C	G	G	A	A	T	G	C	A	C
KVP1508	high-protein genotypes	G	A	C	C	A	T	G	A	G	G	T	T	C	G	C	T	A	T	T	G	C	G	A	A	C	G	T	C	C	G	G	A	A	T	G	T	G	C
KVP1510	high-protein genotypes	G	A	C	C	A	T	G	A	G	G	T	T	C	G	C	T	A	T	T	G	C	G	A	A	C	G	T	C	C	G	G	A	A	T	G	T	G	C
KVP1512	high-protein genotypes	G	A	C	C	G	T	G	A	G	G	T	T	C	G	C	T	A	T	T	G	C	G	A	A	C	G	T	C	C	G	G	A	A	T	G	T	G	C
KVP1472	high-protein genotypes	G	A	C	C	G	T	G	A	G	G	T	T	C	G	C	T	A	T	T	G	C	G	A	A	C	G	T	C	C	G	A	G	A	T	G	T	G	T
KVP1474	high-protein genotypes	G	A	C	C	G	T	G	A	G	G	T	T	C	G	C	T	A	T	T	G	C	G	A	A	C	G	T	C	T	G	A	G	A	T	G	T	G	T
KVP1479	high-protein genotypes	G	A	C	C	G	T	G	A	G	G	T	T	C	G	C	T	A	T	T	G	C	G	A	A	C	G	T	C	T	G	A	G	A	T	G	T	G	T
KVP1496	high-protein genotypes	G	A	C	C	G	T	G	A	G	G	T	T	C	G	C	T	A	T	T	G	C	G	A	A	C	G	T	C	C	G	A	G	A	T	G	T	G	T
KVP1497	high-protein genotypes	G	A	C	C	G	T	G	A	G	G	T	T	C	G	C	T	A	T	T	G	C	G	A	A	C	G	T	C	C	G	A	G	A	T	G	C	A	C
KVP1500	high-protein genotypes	G	A	C	C	G	T	G	A	G	G	T	T	C	G	C	T	A	T	T	G	C	G	A	A	C	G	T	C	C	G	A	G	A	T	G	C	A	C
KVP1459	high-protein genotypes	G	A	C	C	G	T	G	A	A	A	G	A	C	G	A	T	G	G	T	G	C	G	A	A	C	G	T	C	C	G	A	G	A	T	G	T	G	T
KVP1461	high-protein genotypes	G	A	C	C	G	T	G	A	A	A	G	A	C	G	A	T	G	G	T	G	C	G	A	A	C	G	T	C	T	A	G	A	A	T	G	C	A	C
KVP1469	high-protein genotypes	G	A	C	C	G	T	G	A	A	A	G	A	C	G	A	T	G	G	T	G	C	G	A	A	C	G	T	C	C	A	G	A	A	T	G	C	A	C
KVP1488	high-protein genotypes	G	A	C	C	G	T	G	A	A	A	G	A	C	G	A	T	G	G	T	G	C	G	A	A	C	G	T	C	C	G	G	A	A	T	G	T	G	C
KVP1502	high-protein genotypes	G	A	C	C	G	T	G	A	A	A	G	A	C	G	A	T	G	G	C	A	C	C	T	A	T	A	T	C	C	G	G	A	A	T	G	C	A	C
KVP1489	high-protein genotypes	G	A	C	C	G	T	A	G	G	G	T	T	C	G	C	T	A	T	C	A	C	C	T	A	T	A	T	C	C	A	G	A	A	T	G	T	G	C
KUG1524	high-oil genotypes	C	G	A	A	G	T	G	A	G	G	T	T	C	G	C	T	A	T	C	A	C	C	T	A	T	A	T	C	C	G	G	A	A	T	G	C	A	C
KUG1547	high-oil genotypes	C	G	A	A	G	T	G	A	G	G	T	T	C	G	C	T	A	T	C	A	C	C	T	A	T	A	T	C	C	G	G	A	A	T	G	T	G	C
KUG1566	high-oil genotypes	C	G	A	A	G	T	G	A	G	G	T	T	C	G	C	T	A	T	C	A	C	C	T	A	T	A	T	C	C	A	G	A	A	T	G	T	G	C
KUG1514	high-oil genotypes	G	A	C	C	G	T	G	A	G	G	T	T	C	G	C	T	A	T	C	A	C	C	T	A	T	A	T	C	C	G	G	A	A	T	G	C	A	C
KUG1515	high-oil genotypes	G	A	C	C	A	T	G	A	G	G	T	T	C	G	C	T	A	T	C	A	C	C	T	A	T	A	T	C	C	G	G	A	A	T	G	C	A	C
KUG1516	high-oil genotypes	G	A	C	C	G	T	G	A	G	G	T	T	C	G	C	T	A	T	C	A	C	C	T	A	T	A	T	C	C	G	G	A	A	T	G	C	A	C
KUG1518	high-oil genotypes	G	A	C	C	G	T	G	A	G	G	T	T	C	G	C	T	A	T	C	A	C	C	T	A	T	A	T	C	C	G	G	A	A	T	G	C	A	C
KUG1519	high-oil genotypes	G	A	C	C	G	T	G	A	G	G	T	T	C	G	C	T	A	T	C	A	C	C	T	A	T	A	T	C	C	A	G	A	A	T	G	C	A	C
KUG1520	high-oil genotypes	G	A	C	C	G	T	G	A	G	G	T	T	C	G	C	T	A	T	C	A	C	C	T	A	T	A	T	C	C	G	G	A	A	T	G	C	A	C
KUG1521	high-oil genotypes	G	A	C	C	G	T	G	A	G	G	T	T	C	G	C	T	A	T	C	A	C	C	T	A	T	A	T	C	T	G	G	A	A	T	G	C	A	C
KUG1523	high-oil genotypes	G	A	C	C	G	T	G	A	G	G	T	T	C	G	C	T	A	T	C	A	C	C	T	A	T	A	T	C	C	G	G	A	A	T	G	C	A	C
KUG1525	high-oil genotypes	G	A	C	C	G	T	G	A	G	G	T	T	C	G	C	T	A	T	C	A	C	C	T	A	T	A	T	C	T	G	G	A	A	T	G	C	A	C
KUG1526	high-oil genotypes	G	A	C	C	A	T	G	A	G	G	T	T	C	G	C	T	A	T	C	A	C	C	T	A	T	A	T	C	T	G	G	A	A	T	G	C	A	C
KUG1529	high-oil genotypes	G	A	C	C	G	T	G	A	G	G	T	T	C	G	C	T	A	T	C	A	C	C	T	A	T	A	T	C	C	G	G	A	A	T	G	C	A	C
KUG1531	high-oil genotypes	G	A	C	C	G	T	G	A	G	G	T	T	C	G	C	T	A	T	C	A	C	C	T	A	T	A	T	C	C	G	G	A	A	T	G	C	A	C
KUG1532	high-oil genotypes	G	A	C	C	G	T	G	A	G	G	T	T	C	G	C	T	A	T	C	A	C	C	T	A	T	A	T	C	C	G	G	A	A	T	G	C	A	C
KUG1533	high-oil genotypes	G	A	C	C	G	T	G	A	G	G	T	T	C	G	C	T	A	T	C	A	C	C	T	A	T	A	T	C	T	G	G	A	A	T	G	C	A	C
KUG1535	high-oil genotypes	G	A	C	C	G	T	G	A	G	G	T	T	C	G	C	T	A	T	C	A	C	C	T	A	T	A	T	C	C	G	G	A	A	T	G	C	A	C
KUG1537	high-oil genotypes	G	A	C	C	G	T	G	A	G	G	T	T	C	G	C	T	A	T	C	A	C	C	T	A	T	A	T	C	C	G	G	A	A	T	G	C	A	C
KUG1538	high-oil genotypes	G	A	C	C	G	T	G	A	G	G	T	T	C	G	C	T	A	T	C	A	C	C	T	A	T	A	T	C	C	G	G	A	A	T	G	C	A	C
KUG1539	high-oil genotypes	G	A	C	C	A	T	G	A	G	G	T	T	C	G	C	T	A	T	C	A	C	C	T	A	T	A	T	C	C	G	G	A	A	T	G	C	A	C
KUG1540	high-oil genotypes	G	A	C	C	G	T	G	A	G	G	T	T	C	G	C	T	A	T	C	A	C	C	T	A	T	A	T	C	C	G	G	A	A	T	G	C	A	C
KUG1541	high-oil genotypes	G	A	C	C	G	T	G	A	G	G	T	T	C	G	C	T	A	T	C	G	C	C	T	A	C	G	T	C	C	G	G	A	A	T	G	C	A	C
KUG1544	high-oil genotypes	G	A	C	C	G	T	G	A	G	G	T	T	C	G	C	T	A	T	T	G	C	C	T	A	C	G	T	C	C	G	G	A	A	T	G	C	A	C
KUG1552	high-oil genotypes	G	A	C	C	G	T	G	A	G	G	T	T	C	G	C	T	A	T	C	A	C	C	T	A	T	A	T	C	C	G	G	A	A	T	G	T	G	C
KUG1553	high-oil genotypes	G	A	C	C	G	T	G	A	G	G	T	T	C	G	C	T	A	T	C	A	C	C	T	A	T	A	T	C	C	G	G	A	A	T	G	C	A	C
KUG1554	high-oil genotypes	G	A	C	C	G	T	G	A	G	G	T	T	C	G	C	T	A	T	C	A	C	C	T	A	T	A	T	C	C	G	G	A	A	T	G	C	A	C
KUG1555	high-oil genotypes	G	A	C	C	G	T	G	A	G	G	T	T	C	G	C	T	A	T	C	A	C	C	T	A	T	A	T	C	C	G	G	A	A	T	G	C	A	C
KUG1556	high-oil genotypes	G	A	C	C	G	T	G	A	G	G	T	T	C	G	C	T	A	T	T	A	C	C	T	A	T	A	T	C	C	G	G	A	A	T	G	C	A	C
KUG1557	high-oil genotypes	G	A	C	C	G	T	G	A	G	G	T	T	C	G	C	T	A	T	C	A	C	C	T	A	T	A	T	C	T	G	G	A	A	T	G	C	A	C
KUG1558	high-oil genotypes	G	A	C	C	G	T	G	A	G	G	T	T	C	G	C	T	A	T	C	A	C	C	T	A	T	A	T	C	C	G	G	A	A	T	G	C	A	C
KUG1559	high-oil genotypes	G	A	C	C	G	T	G	A	G	G	T	T	C	G	C	T	A	T	C	A	C	C	T	A	T	A	T	C	T	A	G	A	A	T	G	C	A	C
KUG1560	high-oil genotypes	G	A	C	C	G	T	G	A	G	G	T	T	C	G	C	T	A	T	C	A	C	C	T	A	T	A	T	C	C	G	G	A	A	T	G	C	A	C
KUG1561	high-oil genotypes	G	A	C	C	G	T	G	A	G	G	T	T	C	G	C	T	A	T	C	A	C	C	T	A	T	A	T	C	C	G	G	A	A	T	G	C	A	C
KUG1562	high-oil genotypes	G	A	C	C	G	T	G	A	G	G	T	T	C	G	C	T	A	T	C	A	C	C	T	A	T	A	T	C	T	A	G	A	A	T	G	C	A	C
KUG1563	high-oil genotypes	G	A	C	C	G	T	G	A	G	G	T	T	C	G	C	T	A	T	C	A	C	C	T	A	T	A	T	C	C	G	G	A	A	T	G	T	G	C
KUG1564	high-oil genotypes	G	A	C	C	G	T	G	A	G	G	T	T	C	G	C	T	A	T	C	A	C	C	T	A	T	A	T	C	C	G	G	A	A	T	G	T	G	C
KUG1565	high-oil genotypes	G	A	C	C	G	T	G	A	G	G	T	T	C	G	C	T	A	T	C	A	C	C	T	A	T	A	T	C	C	G	G	A	A	T	G	C	A	C
KUG1568	high-oil genotypes	G	A	C	C	G	T	G	A	G	G	T	T	C	G	C	T	A	T	C	A	C	C	T	A	T	A	T	C	C	G	G	A	A	T	G	C	A	C
KUG1569	high-oil genotypes	G	A	C	C	G	T	G	A	G	G	T	T	C	G	C	T	A	T	C	A	C	C	T	A	T	A	T	C	C	G	G	A	A	T	G	T	G	C
KUG1543	high-oil genotypes	G	A	C	C	G	T	G	A	A	A	G	A	C	G	A	T	G	G	C	A	C	C	T	A	T	A	T	C	C	G	G	A	A	T	G	C	A	C
KUG1546	high-oil genotypes	G	A	C	C	G	T	G	A	A	A	G	A	C	G	A	T	G	G	C	A	C	C	T	A	T	A	T	C	C	G	G	A	A	T	G	C	A	C
KUG1548	high-oil genotypes	G	A	C	C	G	T	G	A	A	A	G	A	C	G	A	T	G	G	C	A	C	C	T	A	T	A	T	C	C	G	G	A	A	T	G	C	A	C
KUG1551	high-oil genotypes	G	A	C	C	G	T	G	A	G	G	G	A	C	G	C	T	A	T	C	A	C	C	T	A	T	A	T	C	T	G	G	A	A	T	G	C	A	C
KUG1567	high-oil genotypes	G	A	C	C	G	T	G	A	A	A	G	A	C	G	A	T	G	G	C	A	C	C	T	A	T	A	T	C	C	G	G	A	A	T	G	T	G	C
KUG1528	high-oil genotypes	G	A	C	C	G	T	G	A	A	A	G	A	C	G	A	T	G	G	T	G	C	G	A	A	C	G	T	C	C	G	G	A	A	T	G	T	G	C
KUG1542	high-oil genotypes	G	A	C	C	G	T	G	A	A	A	G	A	C	G	A	T	G	G	T	G	C	G	A	A	C	G	T	C	C	G	G	A	A	T	G	C	A	C
KUG1545	high-oil genotypes	G	A	C	C	G	T	G	A	A	A	G	A	C	G	A	T	G	G	T	G	C	G	A	A	C	G	T	C	T	A	G	A	A	T	G	C	A	C
KUG1549	high-oil genotypes	G	A	C	C	G	T	G	A	A	A	G	A	C	G	A	T	G	G	T	G	C	G	A	A	C	G	T	C	C	G	G	A	A	T	G	C	A	C
KUG1550	high-oil genotypes	G	A	C	C	G	T	G	A	A	A	G	A	C	G	A	T	G	G	T	G	C	G	A	A	C	G	T	C	C	G	G	A	A	T	G	C	A	C
Williams82	reference variety	G	A	C	C	G	T	G	A	A	A	G	A	C	G	A	T	G	G	T	G	C	C	T	A	C	G	T	C	C	G	G	A	A	T	G	C	A	C
	In red are marked diagnostic SNP markers used for allele discrimination.
